# Supplementary material for: Nanometallurgy in solution: organometallic synthesis of intermetallic Pd–Ga colloids and their activity in semi-hydrogenation catalysis
Source: Royal Society of Chemistry journal article supplement (doi:10.1039/d1nr04550d), 2021-01-01
Supplement: d1nr04550d1.pdf [file d1nr04550d1.pdf]

## **Nanometallurgy in Solution: Organometallic Synthesis of Intermetallic Pd–Ga Colloids and their Activity in Semi-Hydrogenation Catalysis.**

Lena Staiger<sup>1</sup>, Tim Kratky<sup>2</sup>, Sebastian Günther<sup>2</sup>, Alexander Urstoeger<sup>3</sup>, Michael Schuster<sup>3</sup>, Ondrej Tomanek<sup>4</sup>, Radek Zboril<sup>4</sup>, Richard W. Fischer<sup>5</sup>, Roland A. Fischer<sup>1,\*</sup> and Mirza Cokoja<sup>1,\*</sup>

<sup>1</sup> Chair of Inorganic and Metal-Organic Chemistry, Catalysis Research Center and Department of Chemistry, Technical University of Munich, Ernst-Otto-Fischer-Straße 1, D-85747 Garching bei München, Germany. Tel: +49 89 289 13478; e-mail: mirza.cokoja@tum.de; roland.fischer@tum.de.

<sup>2</sup> Chair of Physical Chemistry with Focus on Catalysis, Catalysis Research Center and Department of Chemistry, Technical University of Munich, Garching bei München, Germany.

<sup>3</sup> Working Group Analytical Chemistry, Technical University of Munich, Garching bei München, Germany.

<sup>4</sup> Regional Center of Advanced Technologies and Materials RCPTM, Olomouc, Czech Republic.

<sup>5</sup> Clariant Produkte (Deutschland) GmbH, Bruckmühl, Germany.

## **Supporting Information**

## Content

|                                                                                                                  |    |
|------------------------------------------------------------------------------------------------------------------|----|
| 1. Characterization of Pd <sub>1-x</sub> Ga <sub>x</sub> (x = 0.67, 0.5, 0.33) colloids.....                     | 3  |
| NMR spectroscopy.....                                                                                            | 3  |
| GC-MS measurements.....                                                                                          | 5  |
| LIFDI-MS measurements.....                                                                                       | 7  |
| HR-TEM measurements.....                                                                                         | 9  |
| DLS measurements.....                                                                                            | 10 |
| IR measurements.....                                                                                             | 11 |
| Raman measurements.....                                                                                          | 12 |
| PXRD measurements.....                                                                                           | 13 |
| Elemental analysis.....                                                                                          | 13 |
| 2. Catalytic performance of Pd <sub>1-x</sub> Ga <sub>x</sub> colloids in the semi-hydrogenation of alkynes..... | 14 |
| Error calculation.....                                                                                           | 14 |
| Catalyst stability during catalysis: NMR study.....                                                              | 15 |
| Parameter optimization.....                                                                                      | 16 |
| Variation of the catalyst amount.....                                                                            | 16 |
| Calculation of rate constants.....                                                                               | 18 |
| Substrate variation.....                                                                                         | 19 |
| Substrate oligomerization using terminal alkynes.....                                                            | 20 |
| Calculation of TOF values and comparison with literature-known systems.....                                      | 20 |
| 3. Analysis of the Pd <sub>1-x</sub> Ga <sub>x</sub> (x = 0.67, 0.5, 0.33) colloids after catalysis runs.....    | 23 |
| HR-TEM measurements.....                                                                                         | 23 |
| DLS measurements.....                                                                                            | 23 |
| IR measurements.....                                                                                             | 24 |
| 4. References.....                                                                                               | 25 |

# 1. Characterization of Pd<sub>1-x</sub>Ga<sub>x</sub> (x = 0.67, 0.5, 0.33) colloids

## NMR spectroscopy

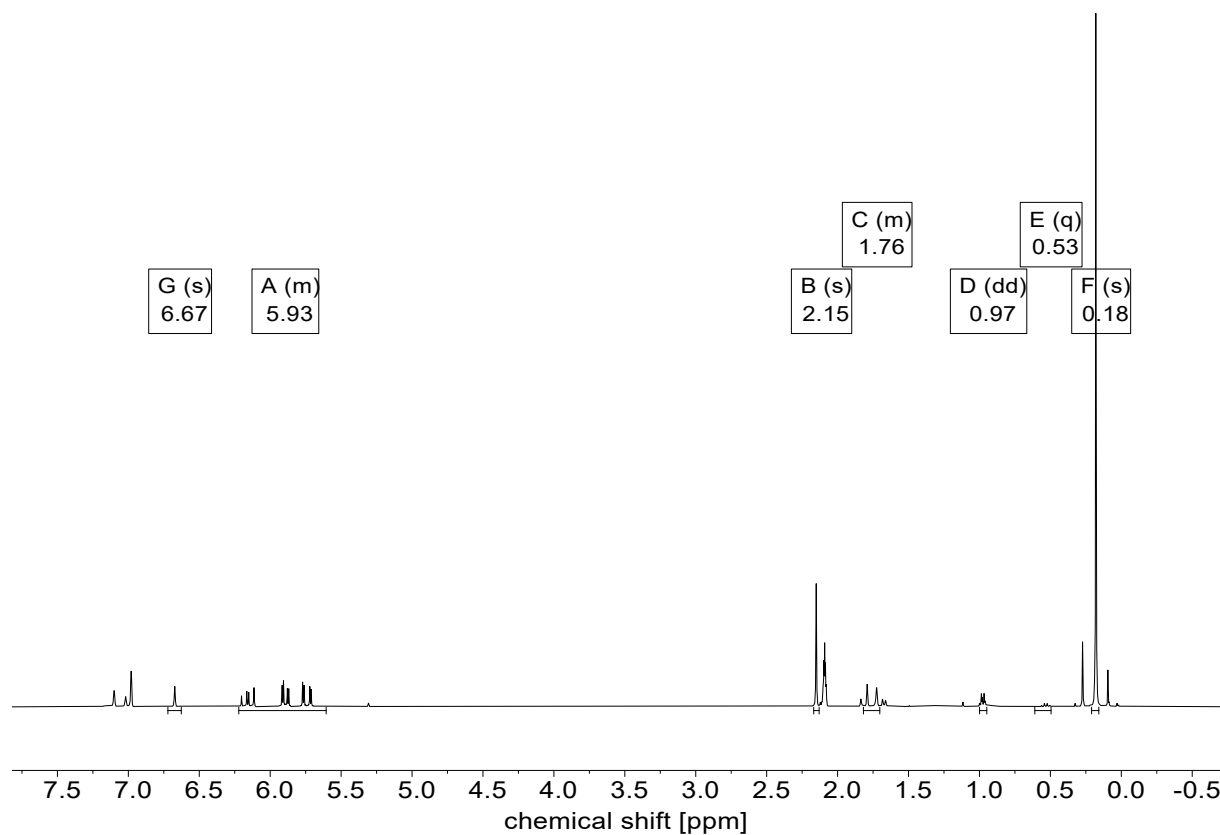

**Figure S1.** Representative <sup>1</sup>H NMR spectra (toluene-*d*<sub>8</sub>) of colloidal Pd<sub>1-x</sub>Ga<sub>x</sub> NPs. <sup>1</sup>H NMR (400 MHz, toluene-*d*<sub>8</sub>): 6.67 (s, 3H, mesitylene as internal standard, CH), 5.93 (m, 6H, dvds, CH, CH<sub>2</sub>), 2.15 (s, 9H, mesitylene as internal standard, CH<sub>3</sub>), 1.76 (m, Cp\*H, 12H, CH<sub>3</sub>), 0.97 (d, Cp\*H, 3H, CH<sub>3</sub>), 0.53 (q, Cp\*H, 1H, CH), 0.18 (s, dvds, 12H, CH<sub>3</sub>). Signals of unreacted GaCp\* were not detected for all samples.

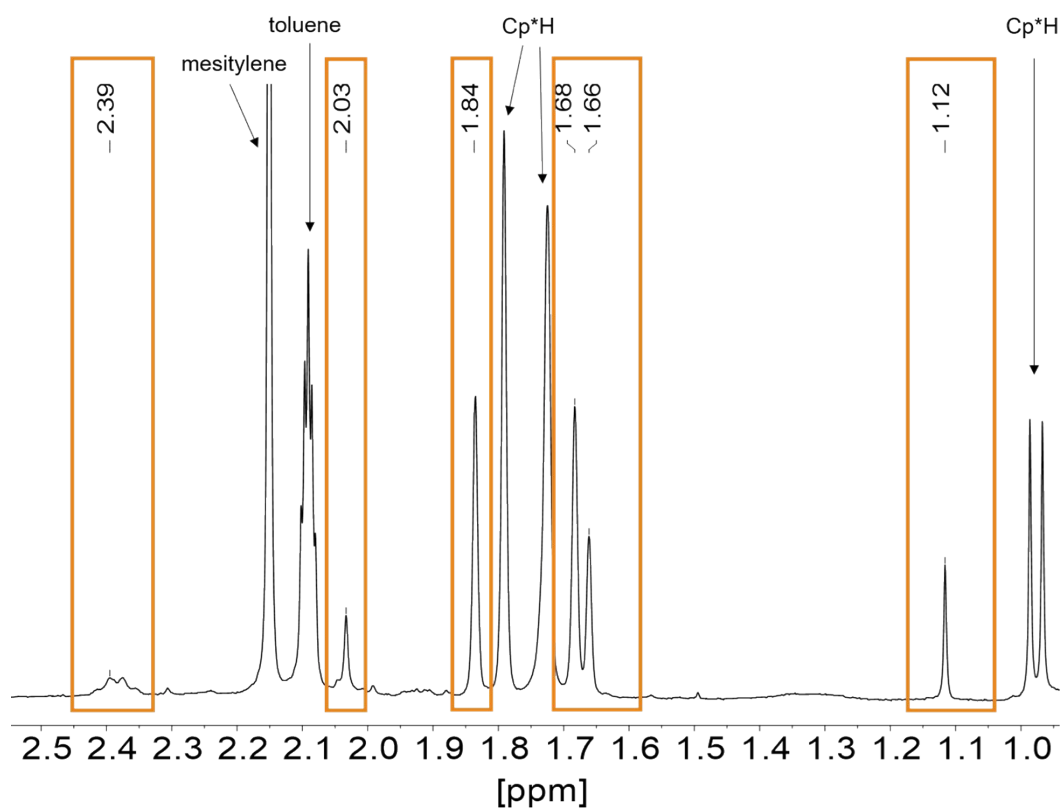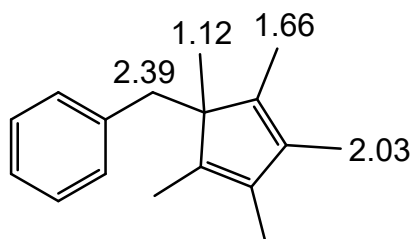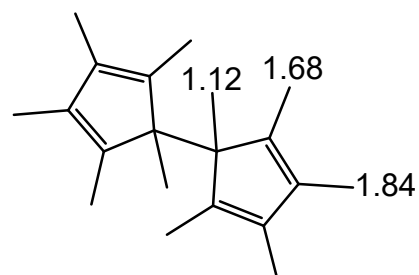

**Figure S2.** Zoom-in of a representative  $^1\text{H}$  NMR spectra (toluene- $d_8$ ) of colloidal  $\text{Pd}_{1-x}\text{Ga}_x$  NPs showing the signals of C-C coupling products (orange marked). Note that due to overlapping signals and weak signal intensities, a distinct signal assignment is not possible.

## GC-MS measurements

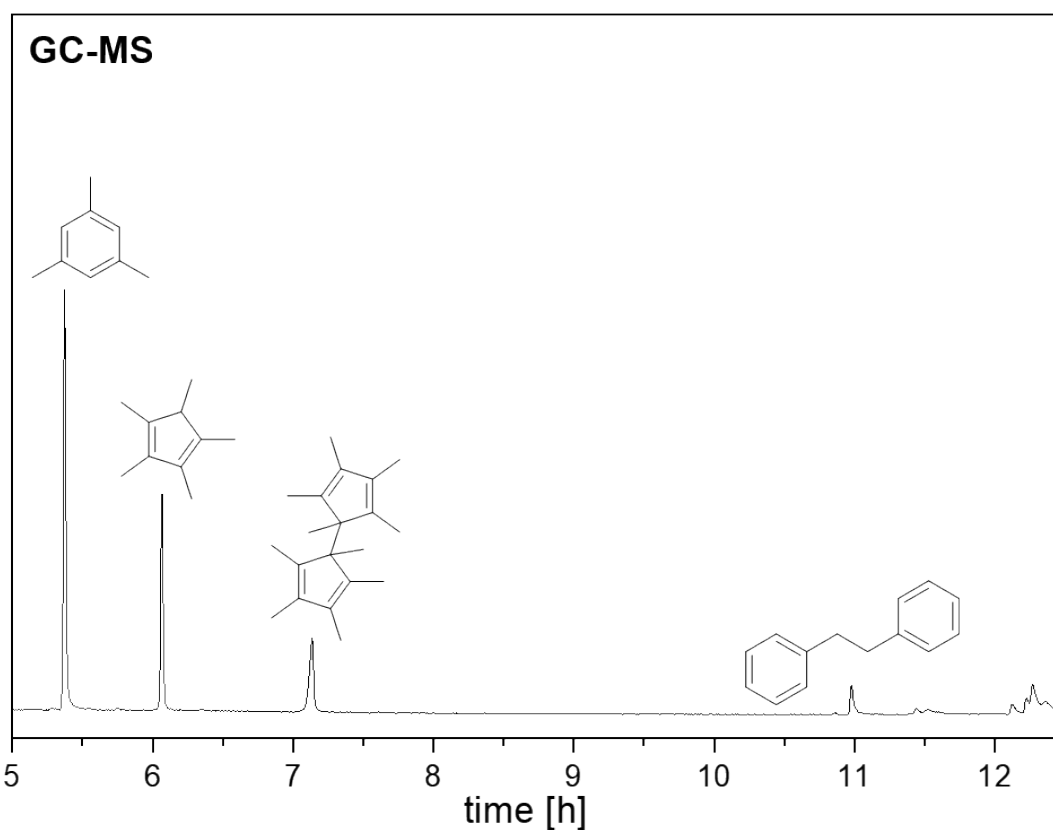

**Figure S3.** Representative GC chromatogram of colloidal Pd<sub>1-x</sub>Ga<sub>x</sub> NPs showing mesitylene as internal standard and products of a C-H activation reactivity.

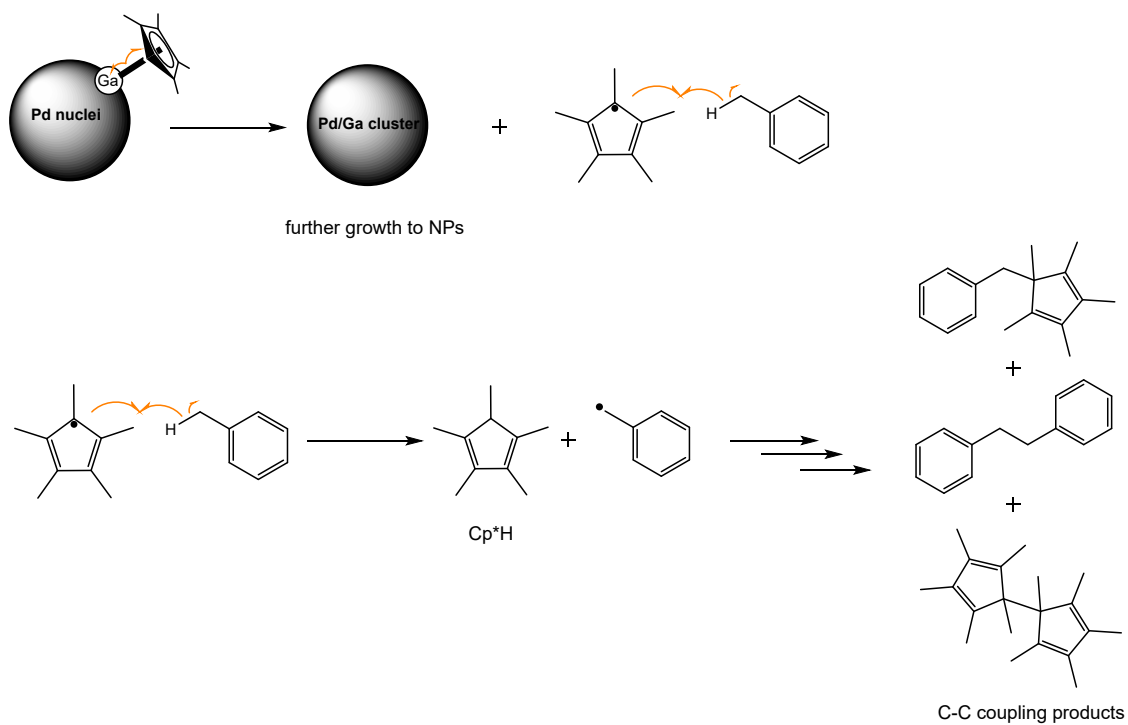

**Figure S4.** Proposed reaction mechanism of Pd<sub>1-x</sub>Ga<sub>x</sub> NP formation by a radical C-C coupling mechanism.

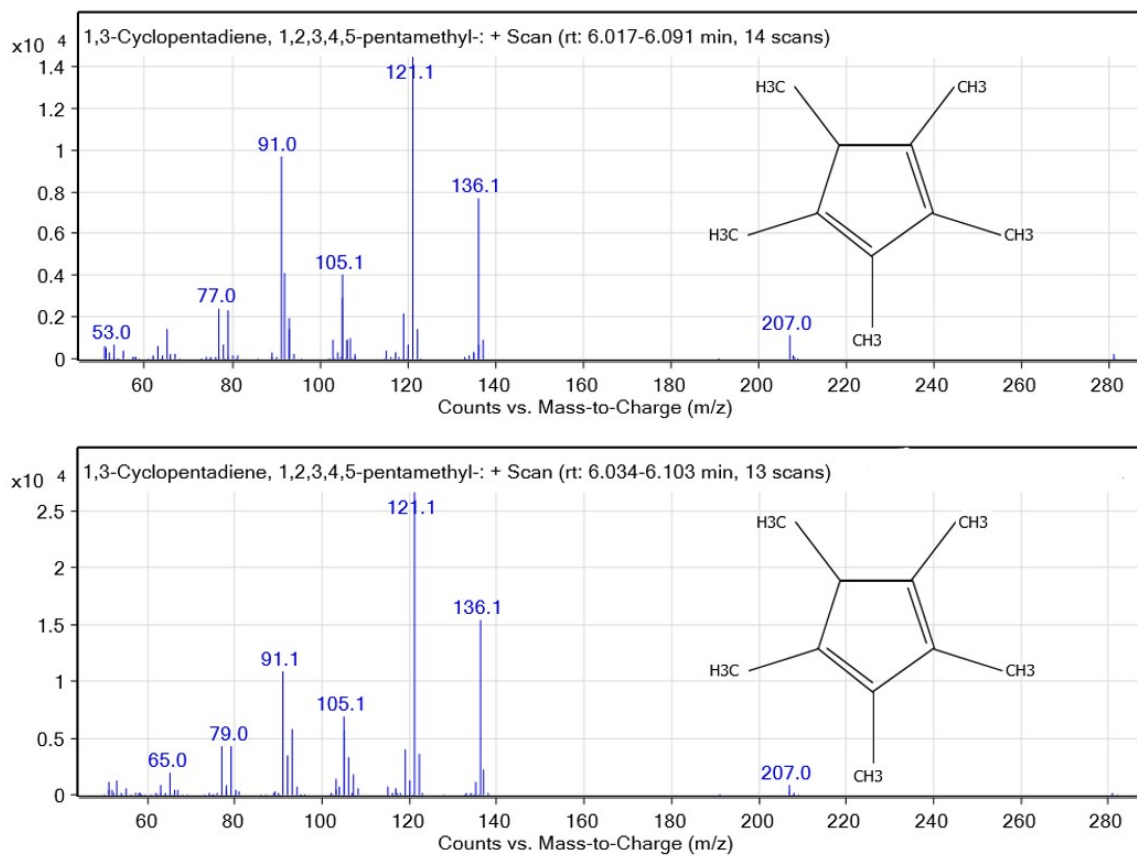

**Figure S5.** GC-MS mass spectra of Cp\*H after the targeted decomposition experiments of Pd<sub>0.5</sub>Ga<sub>0.5</sub> colloids with H<sub>2</sub>O (above) and D<sub>2</sub>O (bottom) showing no differences.

## LIFDI-MS measurements

**Table S1.** Measured and calculated signals of LIFDI-MS measurements during the synthesis of Pd<sub>0.5</sub>Ga<sub>0.5</sub> and Pd<sub>0.33</sub>Ga<sub>0.67</sub> colloids. Most intense signals are marked in bold.

| Applied Pd/Ga ratio | Chemical formula                                                                      | Calculated m/z [a.u.] | Measured m/z [a.u.] | Temperature [°C] |
|---------------------|---------------------------------------------------------------------------------------|-----------------------|---------------------|------------------|
| 1:1                 | [Pd <sub>2</sub> Ga(dvds)(toluene) <sub>2</sub> ]                                     | 649.3                 | 649.2               | -20              |
| 1:1                 | [Pd <sub>3</sub> Ga <sub>3</sub> ]Cp*                                                 | 663.6                 | 665.1               | -20              |
| 1:1                 | <b>[Pd<sub>3</sub>Ga<sub>4</sub>]Cp*<sub>3</sub>dvds</b>                              | 1190                  | 1190.1              | -10              |
| 1:1                 | [Pd <sub>4</sub> Ga <sub>4</sub> ]Cp* <sub>3</sub> dvds                               | 1296                  | 1294.7              | -10              |
| 1:1                 | [Pd <sub>4</sub> Ga <sub>5</sub> ]Cp* <sub>4</sub> tol <sub>2</sub>                   | 1497                  | 1496.6              | -10              |
| 1:1                 | <b>[Pd<sub>4</sub>Ga<sub>5</sub>]Cp*<sub>4</sub>dvds</b>                              | 1500                  | 1501.2              | -10              |
| 1:1                 | <b>[Pd<sub>3</sub>Ga<sub>3</sub>]Cp*<sub>4</sub>(dvds)<sub>3</sub>H<sub>4</sub></b>   | 1632                  | 1632.8              | -10              |
| 1:1                 | [Pd <sub>4</sub> Ga <sub>3</sub> ]Cp* <sub>4</sub> (dvds) <sub>3</sub> H <sub>4</sub> | 1739                  | 1738.8              | -10              |
| 1:2                 | PdGa <sub>4</sub> Cp* <sub>3</sub> H <sub>2</sub>                                     | 792                   | 792.5               | -20              |
| 1:2                 | PdGa <sub>3</sub> Cp*(dvds) <sub>2</sub> H <sub>3</sub>                               | 828                   | 827.5               | -20              |
| 1:2                 | PdGa <sub>4</sub> Cp*(dvds) <sub>2</sub> H <sub>4</sub>                               | 897                   | 897.5               | -20              |
| 1:2                 | PdGa <sub>5</sub> Cp* <sub>4</sub> H <sub>2</sub>                                     | 998                   | 997.9               | -20              |
| 1:2                 | PdGa <sub>3</sub> Cp*(dvds) <sub>3</sub> H <sub>2</sub>                               | 1012                  | 1012.1              | -20              |
| 1:2                 | Pd <sub>2</sub> Ga <sub>4</sub> Cp* <sub>4</sub> H                                    | 1034                  | 1033.9              | -20              |
| 1:2                 | Pd <sub>2</sub> Ga <sub>4</sub> Cp* <sub>3</sub> (dvds)H <sub>2</sub>                 | 1085                  | 1085.1              | -20              |
| 1:2                 | <b>Pd<sub>2</sub>Ga<sub>5</sub>Cp*<sub>4</sub></b>                                    | 1102                  | 1102.1              | -20              |
| 1:2                 | Pd <sub>2</sub> Ga <sub>4</sub> Cp* <sub>2</sub> (dvds) <sub>2</sub> H <sub>3</sub>   | 1138                  | 1138.7              | -20              |
| 1:2                 | Pd <sub>3</sub> Ga <sub>3</sub> Cp* <sub>2</sub> (dvds) <sub>2</sub>                  | 1170                  | 1170.3              | -20              |
| 1:2                 | <b>Pd<sub>3</sub>Ga<sub>4</sub>Cp*<sub>3</sub>(dvds)</b>                              | 1190                  | 1190.0              | -20              |
| 1:2                 | Pd <sub>2</sub> Ga <sub>5</sub> Cp* <sub>2</sub> (dvds) <sub>2</sub> H <sub>4</sub>   | 1209                  | 1208.6              | -20              |
| 1:2                 | Pd <sub>4</sub> Ga <sub>5</sub> Cp* <sub>4</sub>                                      | 1308                  | 1307.9              | -20              |
| 1:2                 | Pd <sub>2</sub> Ga <sub>5</sub> Cp* <sub>3</sub> (dvds) <sub>2</sub> H <sub>3</sub>   | 1344                  | 1343.7              | -20              |
| 1:2                 | Pd <sub>5</sub> Ga <sub>10</sub> (dvds)                                               | 1413                  | 1414.1              | -20              |
| 1:2                 | <b>Pd<sub>4</sub>Ga<sub>5</sub>Cp*<sub>4</sub>(dvds)</b>                              | 1500                  | 1500.7              | -20              |
| 1:2                 | Pd <sub>4</sub> Ga <sub>6</sub> Cp* <sub>5</sub>                                      | 1520                  | 1519.9              | -20              |
| 1:2                 | Pd <sub>3</sub> Ga <sub>3</sub> Cp* <sub>2</sub> (dvds)                               | 985                   | 984.8               | -10              |
| 1:2                 | PdGa <sub>3</sub> Cp*(dvds) <sub>3</sub> H <sub>2</sub>                               | 1012                  | 1012.1              | -10              |
| 1:2                 | Pd <sub>3</sub> Ga <sub>3</sub> Cp*(dvds) <sub>2</sub> H <sub>3</sub>                 | 1038                  | 1037.7              | -10              |
| 1:2                 | Pd <sub>3</sub> Ga <sub>3</sub> Cp* <sub>2</sub> (dvds)tol                            | 1077                  | 1077.9              | -10              |
| 1:2                 | Pd <sub>3</sub> Ga <sub>3</sub> Cp* <sub>3</sub> dvds                                 | 1118                  | 1118.1              | -10              |
| 1:2                 | <b>Pd<sub>3</sub>Ga<sub>3</sub>Cp*<sub>2</sub>dvds<sub>2</sub></b>                    | 1171                  | 1171.5              | -10              |

|     |                                                                       |      |        |     |
|-----|-----------------------------------------------------------------------|------|--------|-----|
| 1:2 | <b>Pd<sub>3</sub>Ga<sub>4</sub>Cp*<sub>3</sub>dvds</b>                | 1190 | 1190.3 | -10 |
| 1:2 | <b>Pd<sub>3</sub>Ga<sub>3</sub>Cp*<sub>3</sub>(dvds)<sub>2</sub></b>  | 1307 | 1306.8 | -10 |
| 1:2 | <b>Pd<sub>4</sub>Ga<sub>13</sub>Cp*</b>                               | 1467 | 1467.7 | -10 |
| 1:2 | <b>Pd<sub>4</sub>Ga<sub>5</sub>Cp*<sub>4</sub>dvds</b>                | 1501 | 1501.6 | -10 |
| 1:2 | Ga <sub>4</sub> Cp* <sub>5</sub> (dvds) <sub>3</sub> H <sub>4</sub>   | 1513 | 1513.8 | -10 |
| 1:2 | PdGa <sub>8</sub> Cp*(dvds) <sub>4</sub> H <sub>3</sub>               | 1546 | 1545.9 | -10 |
| 1:2 | Pd <sub>4</sub> Ga <sub>7</sub> Cp* <sub>4</sub> (dvds)H <sub>3</sub> | 1643 | 1643.3 | -10 |

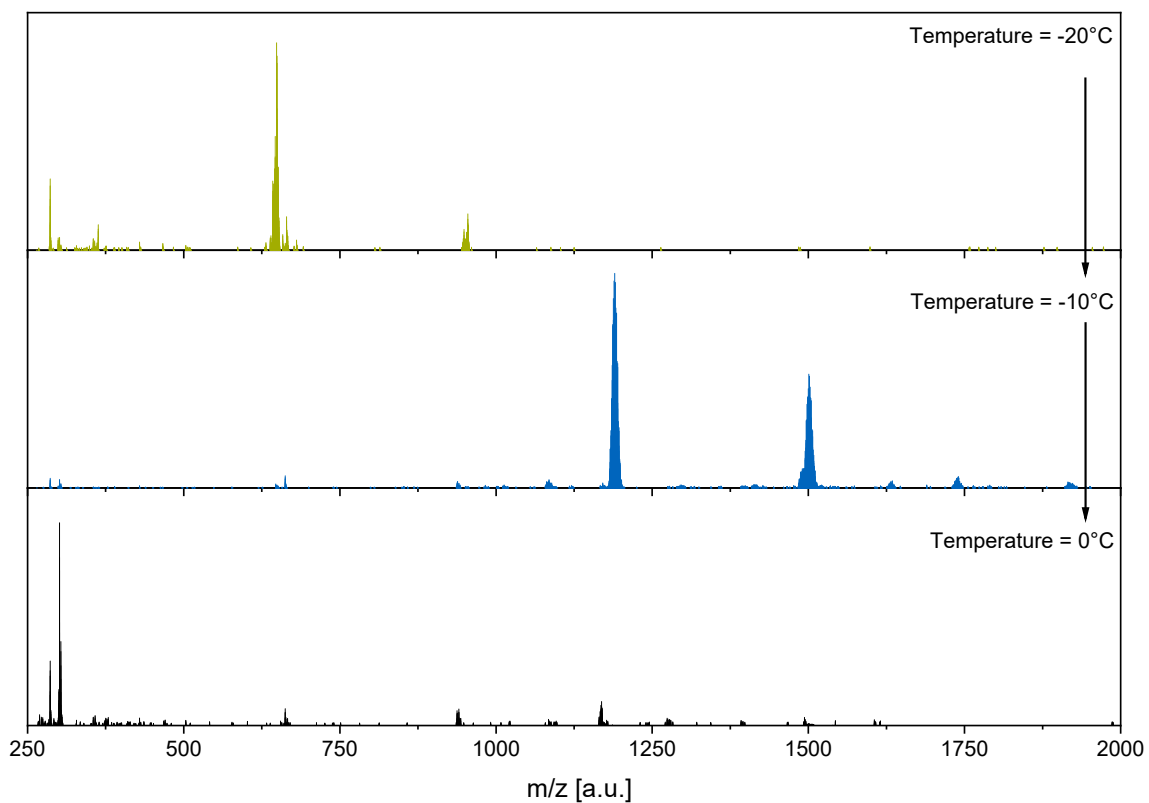

**Figure S6.** Representative LIFDI-MS spectra monitoring the cluster formation and deformation during synthesis of colloidal Pd<sub>0.5</sub>Ga<sub>0.5</sub> NPs at various temperatures (top: -20°C, middle: -10°C, bottom: 0°C) by a slow warming up of the reaction mixture.



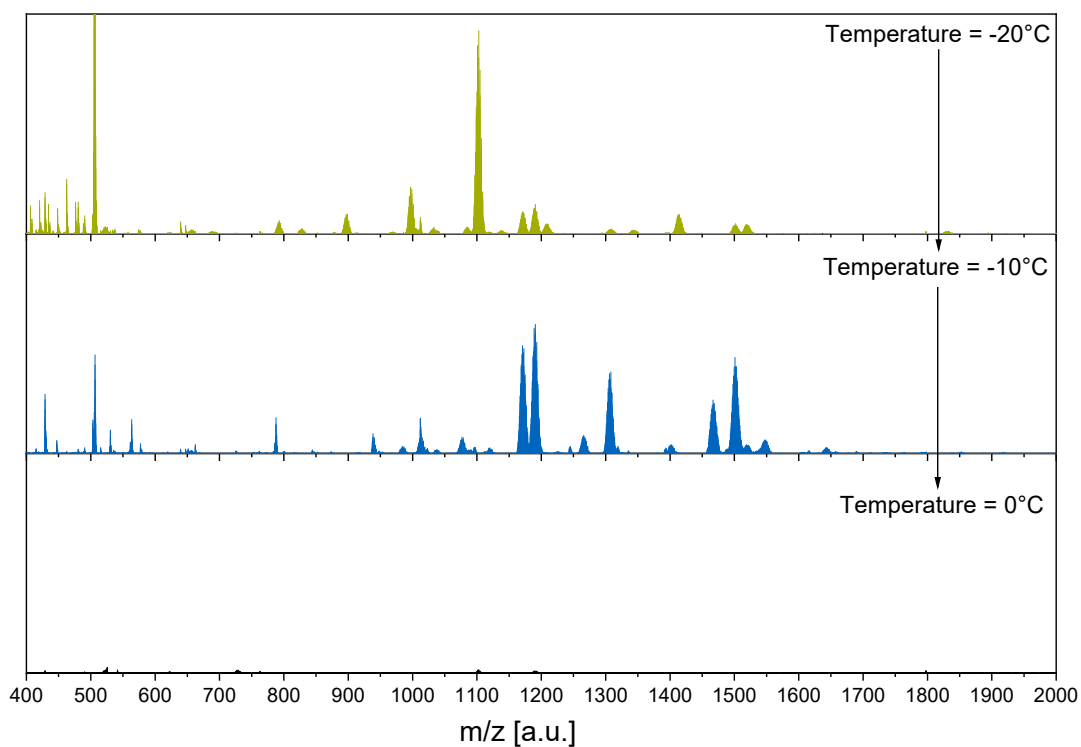

**Figure S7.** Representative LIFDI-MS spectra monitoring the cluster formation and deformation during synthesis of colloidal  $\text{Pd}_{0.33}\text{Ga}_{0.67}$  NPs at various temperatures (top:  $-20^\circ\text{C}$ , middle:  $-10^\circ\text{C}$ , bottom:  $0^\circ\text{C}$ ) by a slow warming up of the reaction mixture.

### HR-TEM measurements

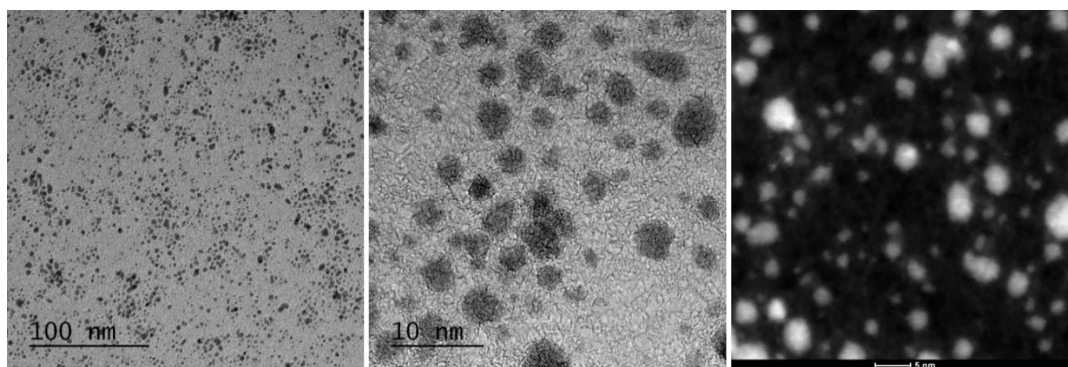

**Figure S8.** HR-TEM image (overview and increased magnification) and HAADF of  $\text{Pd}_{0.9}\text{Ga}_{0.1}$  colloid.

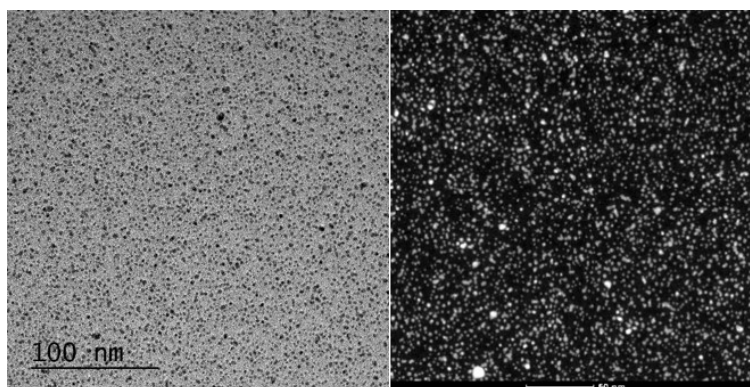

**Figure S9.** HR-TEM image and HAADF of  $\text{Pd}_{0.67}\text{Ga}_{0.33}$  colloids.

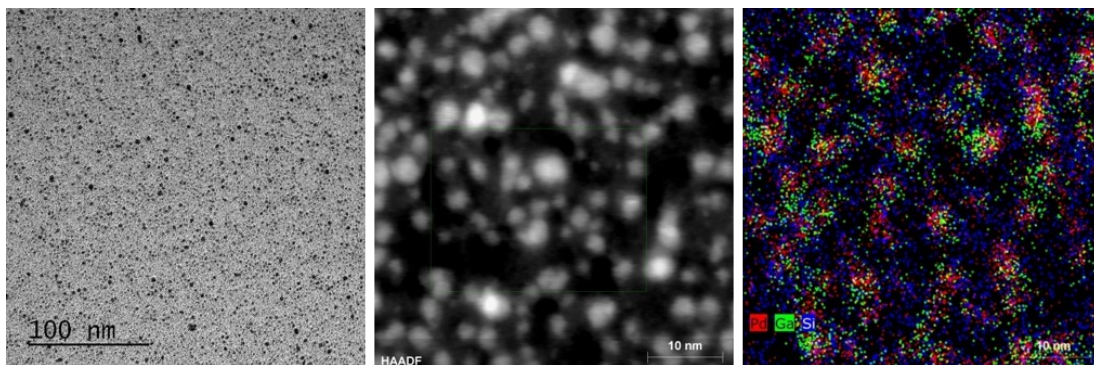

**Figure S10.** HR-TEM image, HAADF and elemental mapping of  $\text{Pd}_{0.5}\text{Ga}_{0.5}$  colloids showing a homogeneous distribution of Pd and Ga.

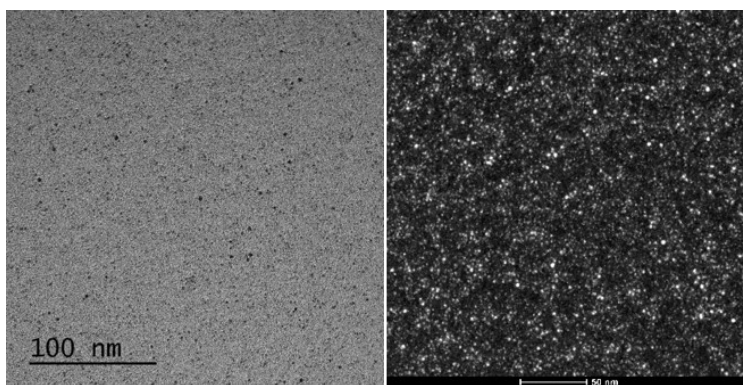

**Figure S11.** HR-TEM image and HAADF of  $\text{Pd}_{0.33}\text{Ga}_{0.67}$  colloids.

## DLS measurements

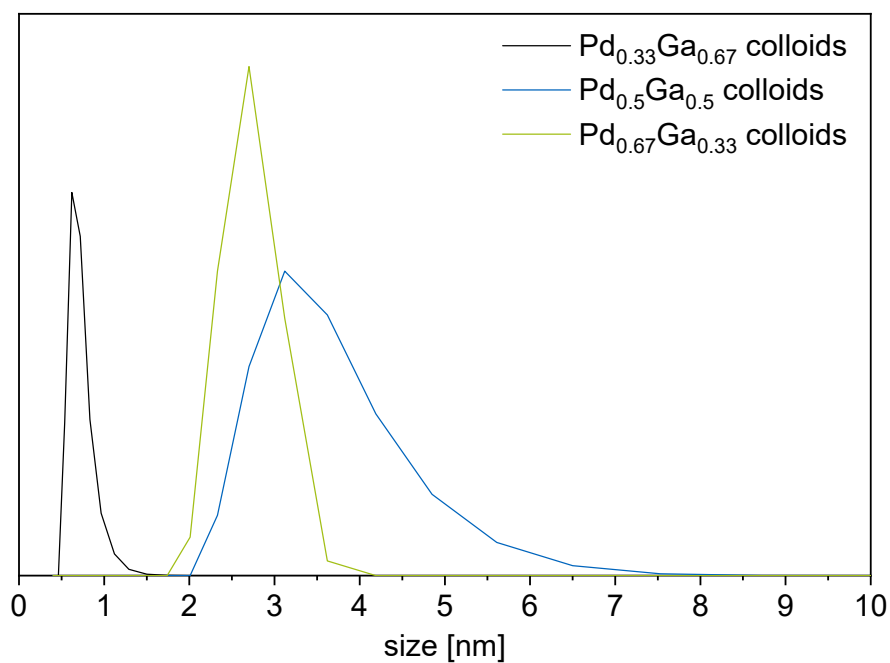

**Figure S12.** DLS measurements of all  $\text{Pd}_{1-x}\text{Ga}_x$  samples at  $0^\circ\text{C}$ .

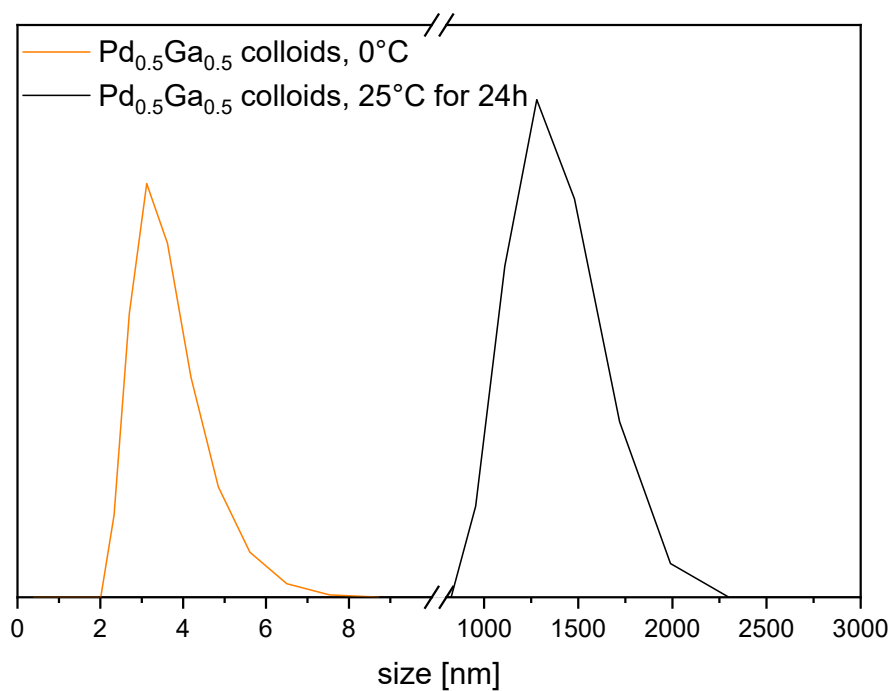

**Figure S13.** DLS measurements of Pd<sub>0.5</sub>Ga<sub>0.5</sub> colloids at 0°C and after 24 h stored at 25°C showing agglomeration with concomitant precipitation.

### IR measurements

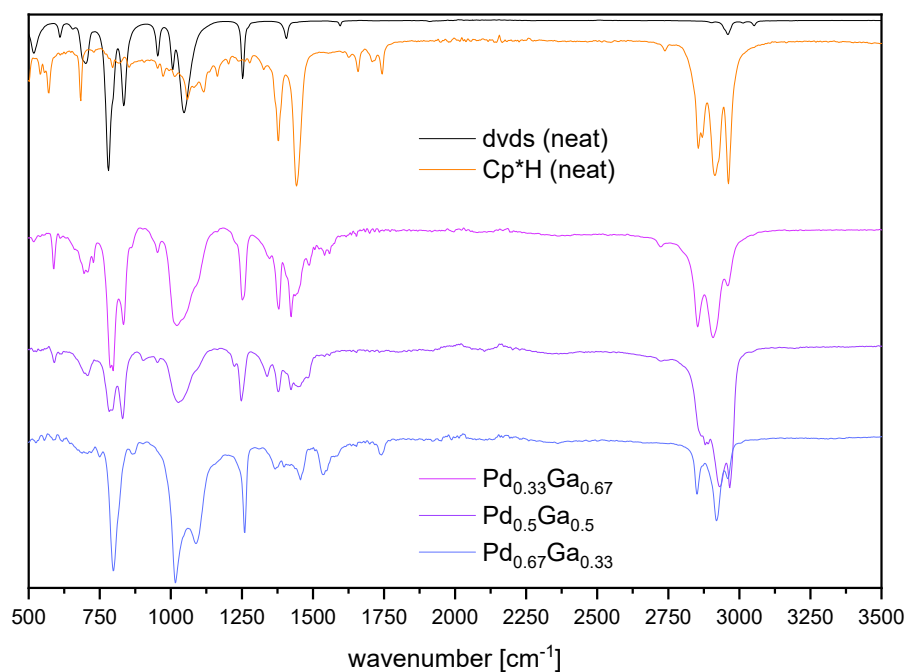

**Figure S14.** ATR FT-IR measurement of the Pd<sub>1-x</sub>Ga<sub>x</sub> colloids (bottom traces) and pure dvds and Cp\*H as reference (upper traces, black and orange).

## Raman measurements

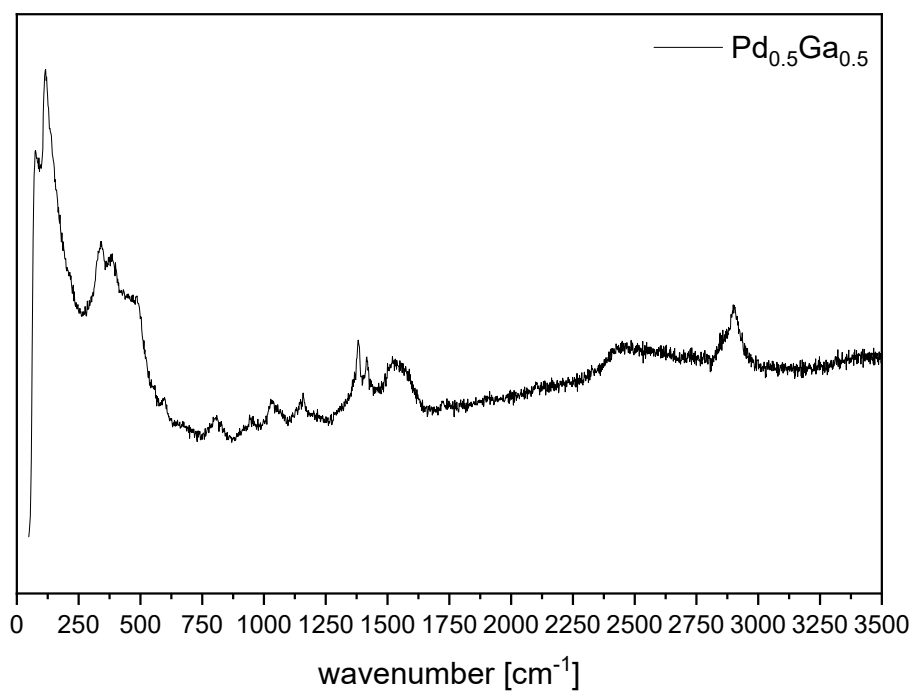

**Figure S15.** Raman measurement of the Pd<sub>0.5</sub>Ga<sub>0.5</sub> colloids after precipitation at 25°C.

## PXRD measurements

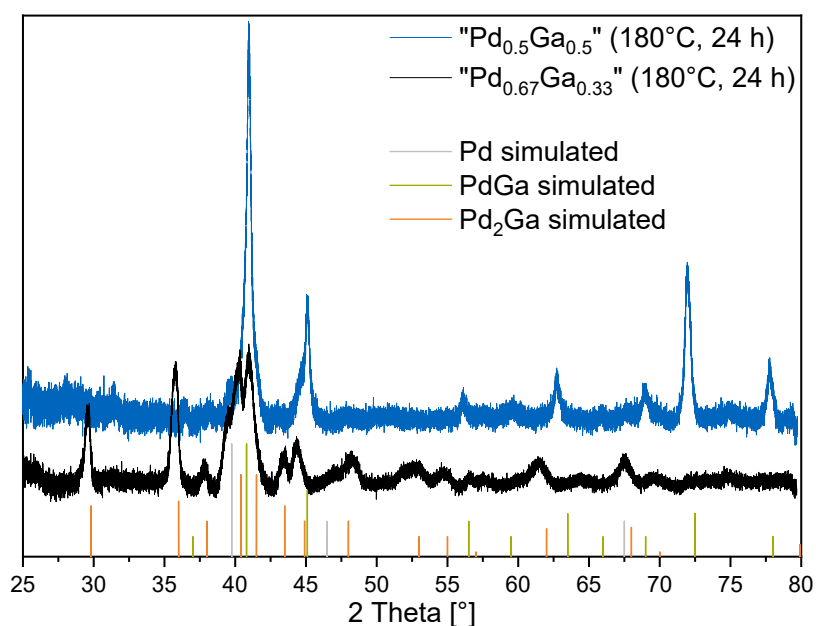

**Figure S16.** PXRD measurements of the precipitated  $\text{Pd}_{1-x}\text{Ga}_x$  colloids. For crystallinity, samples were annealed in vacuum at  $180^\circ\text{C}$  for 24 h prior to measurements. Without annealing, no reflexes could be detected. For Pd/Ga = 1:2, a X-ray diffractometric phase determination was not successful due to the poor crystallinity of the sample.

## Elemental analysis

**Table S2.** ICP-MS measurements of the colloids.

| Sample                             | Pd : Ga (calculated) | Pd : Ga (measured)  |
|------------------------------------|----------------------|---------------------|
| $\text{Pd}_{0.67}\text{Ga}_{0.33}$ | 2 : 1                | $2.52 \pm 0.01$ : 1 |
| $\text{Pd}_{0.5}\text{Ga}_{0.5}$   | 1 : 1                | $1.13 \pm 0.00$ : 1 |
| $\text{Pd}_{0.33}\text{Ga}_{0.67}$ | 0.5 : 1              | $0.60 \pm 0.00$ : 1 |

For preparation, all volatile compounds were removed in vacuo. ICP-MS measurements for all samples show a slightly too low value of Ga. This can be attributed to the synthesis set-up, as the liquid precursor GaCp\* is added to the reaction mixture with a syringe, always leaving a small residue in there.

**Table S3.** Atomic-absorption spectroscopy (AAS) analysis of the precipitated  $\text{Pd}_{1-x}\text{Ga}_x$  colloids.

| Sample                             | Pd : Ga (calculated) | Pd : Ga (measured) |
|------------------------------------|----------------------|--------------------|
| $\text{Pd}_{0.67}\text{Ga}_{0.33}$ | 2 : 1                | 3 : 1              |
| $\text{Pd}_{0.5}\text{Ga}_{0.5}$   | 1 : 1                | 1.4 : 1            |
| $\text{Pd}_{0.33}\text{Ga}_{0.67}$ | 0.5 : 1              | 1 : 1              |

For all samples, insoluble white residues were observed, which can probably be identified as Ga oxide species. Hence, the Ga content is in all samples underestimated.

## 2. Catalytic performance of Pd<sub>1-x</sub>Ga<sub>x</sub> (x = 0.67, 0.5, 0.33) colloids in the semi-hydrogenation of alkynes

### Error calculation

c = conversion, y = yield, s = selectivity (all denoted in %)

$$s = \frac{y}{c}$$

$$\Delta s = \sqrt{\left(\frac{\partial s}{\partial c} \cdot \Delta c\right)^2 + \left(\frac{\partial s}{\partial y} \cdot \Delta y\right)^2}$$

**Table S4.** Example for an error calculation for the selectivities using 5 mol% Pd<sub>0.5</sub>Ga<sub>0.5</sub> colloids (Pd/Ga = 1:1) at 0 °C and 1.0 bar H<sub>2</sub> assuming an instrumental NMR inaccuracy of 1 % due to overlapping of alkyne/alkene/alkane signals.

| Time<br>[h] | c  | Δc   | y  | Δy   | s   | $\left(\frac{\partial s}{\partial c} \cdot \Delta c\right)$ | $\left(\frac{\partial s}{\partial y} \cdot \Delta y\right)$ | Δs<br>(percentaged) | Δs<br>(absolute) |
|-------------|----|------|----|------|-----|-------------------------------------------------------------|-------------------------------------------------------------|---------------------|------------------|
| 1           | 24 | 0,24 | 24 | 0,24 | 100 | 0,01                                                        | 0,01                                                        | 0,014142136         | 1,41             |
| 2           | 39 | 0,39 | 34 | 0,34 | 86  | 0,008717949                                                 | 0,008717949                                                 | 0,012329041         | 1,06             |
| 3           | 45 | 0,45 | 40 | 0,44 | 84  | 0,009777778                                                 | 0,008888889                                                 | 0,013214283         | 1,11             |
| 4           | 50 | 0,5  | 43 | 0,43 | 85  | 0,0086                                                      | 0,0086                                                      | 0,012162237         | 1,03             |
| 5           | 59 | 0,59 | 48 | 0,48 | 81  | 0,008135593                                                 | 0,008135593                                                 | 0,011505466         | 0,94             |
| 6           | 65 | 0,65 | 53 | 0,53 | 81  | 0,008153846                                                 | 0,008153846                                                 | 0,01153128          | 0,93             |

The highest error of the selectivity of Δs = ±1.41% is too low to have an influence on the interpretation of the following catalytic test and therefore were not considered.

## Catalyst stability during catalysis: NMR study

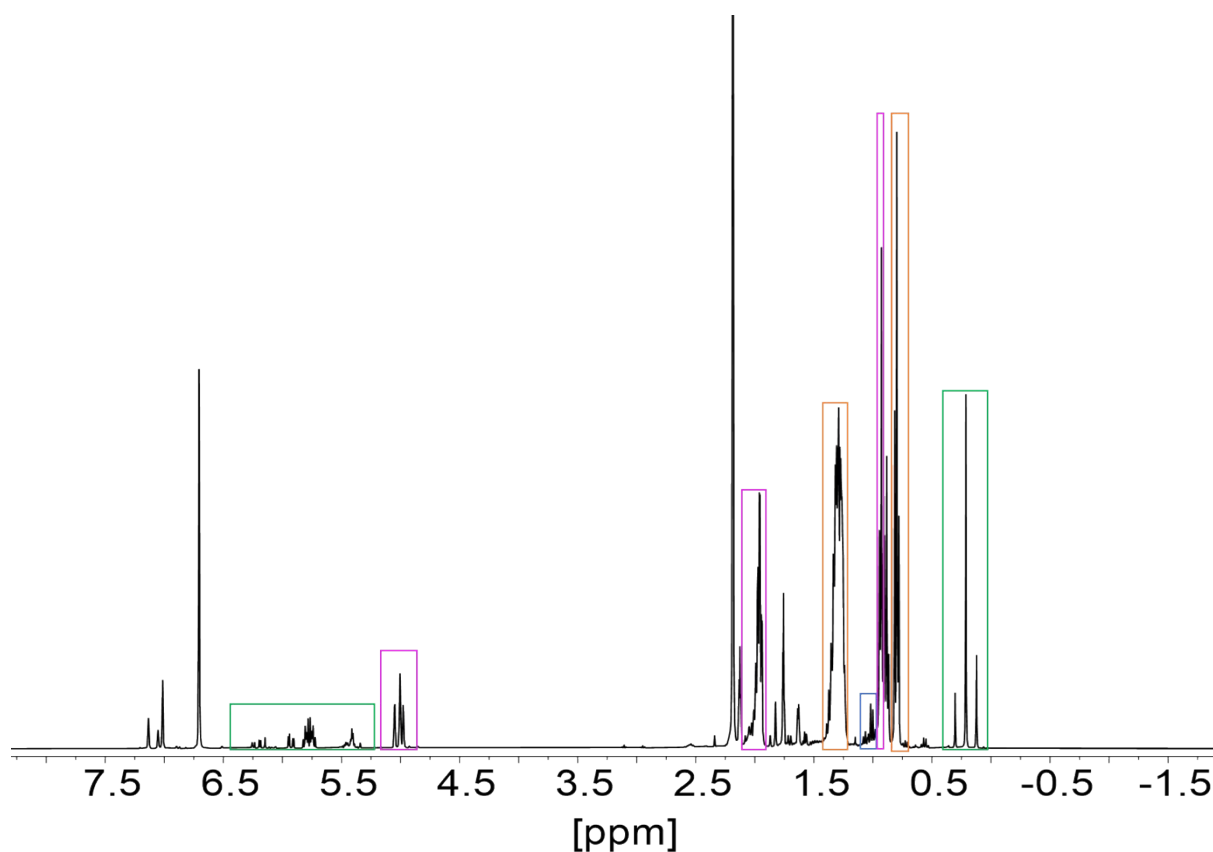

**Figure S17.**  $^1\text{H}$  NMR study of  $\text{Pd}_{0.5}\text{Ga}_{0.5}$  colloids during semi-hydrogenation catalysis of 3-hexyne (5 mol% catalyst,  $0^\circ\text{C}$ , 1 bar  $\text{H}_2$ , 8 h) after 74 % conversion showing small amounts of dvds hydrogenation (signal at 0.11 ppm, 6 H,  $\text{CH}_3$ ). Color code: Dvds in green, 3-hexyne in blue, 3-hexene in purple, *n*-hexane in orange.  $^1\text{H}$  NMR (400 MHz, toluene- $d_8$ ): 7.11-6.98 (m, residual signal of toluene- $d_8$ ), 6.68 (s, 3H, internal standard mesitylene, CH), 5.92 (m, 6H, dvds, CH,  $\text{CH}_2$ ), 4.97 (t, 2H, 3-hexene, CH), 2.15 (s, 9H, internal standard mesitylene,  $\text{CH}_3$ ), 1.92 (m, 4H, 3-hexene,  $\text{CH}_2$ ), 1.76 (m, Cp\*H, 12H,  $\text{CH}_3$ ), 1.25 (m, 8H, *n*-hexane,  $\text{CH}_2$ ), 1.01 (t, 6H, 3-hexyne,  $\text{CH}_3$ ), 0.91 (t, 6H, 3-hexene,  $\text{CH}_3$ ), 0.79 (t, 6H, *n*-hexane,  $\text{CH}_3$ ), 0.53 (q,  $^3J = 8.0$  Hz, Cp\*H, 1H, CH), 0.18 (s, dvds, 12H,  $\text{CH}_3$ ).

## Parameter optimization

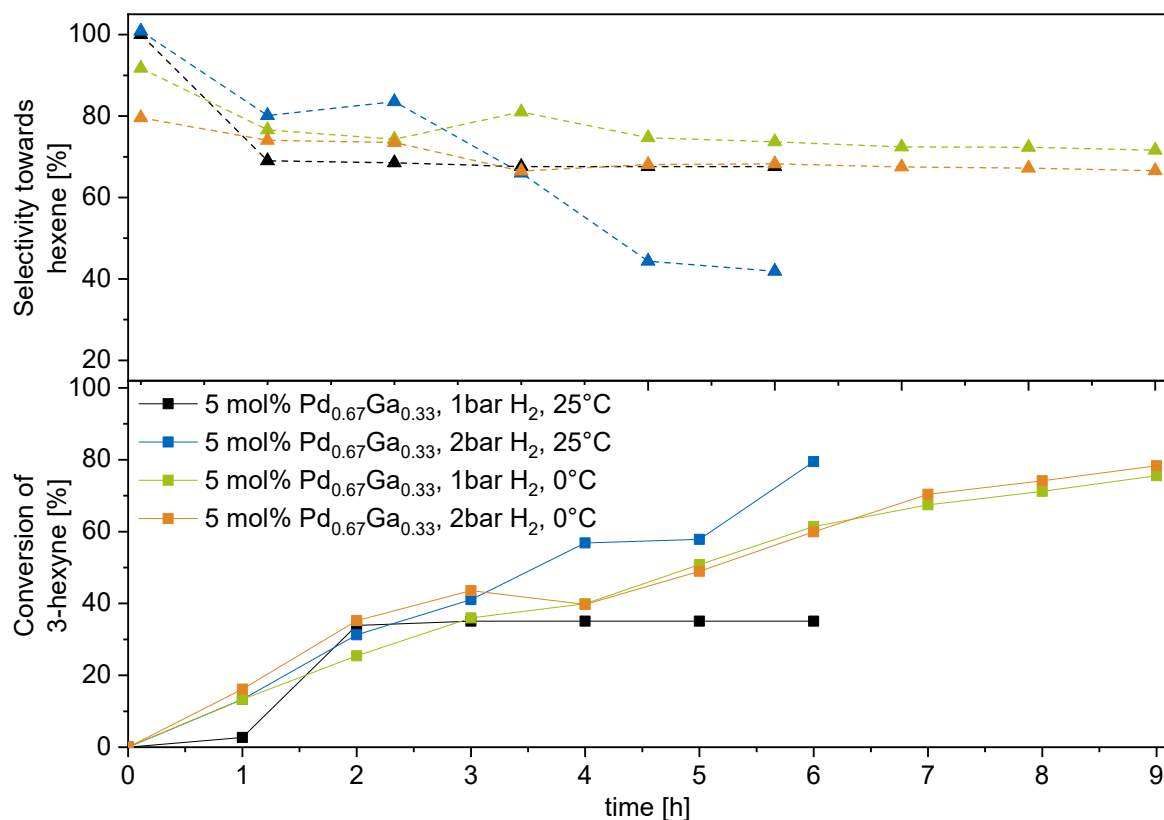

**Figure S18.** Parameter optimization regarding the semi-hydrogenation catalysis using  $\text{Pd}_{0.67}\text{Ga}_{0.33}$  colloids. At 25 °C (Entry 1 and 2), partial particle precipitation and dvds hydrogenation is observed. Entry 1: Complete  $\text{H}_2$  consumption after 2 h.

## Variation of the catalyst amount

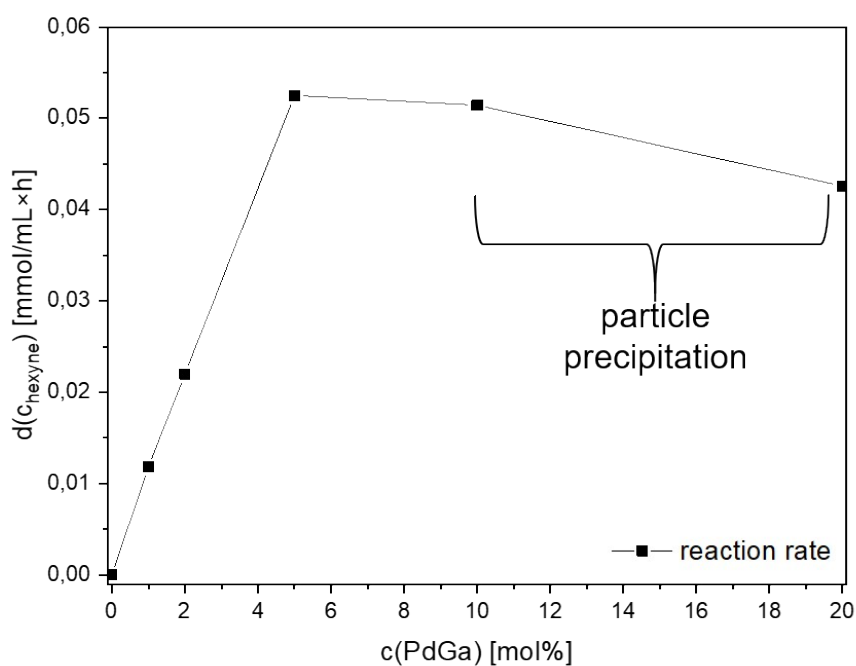

**Figure S19.** Variation of the catalyst amount using  $\text{Pd}_{0.5}\text{Ga}_{0.5}$  colloids highlighting 5 mol% catalyst as optimum.



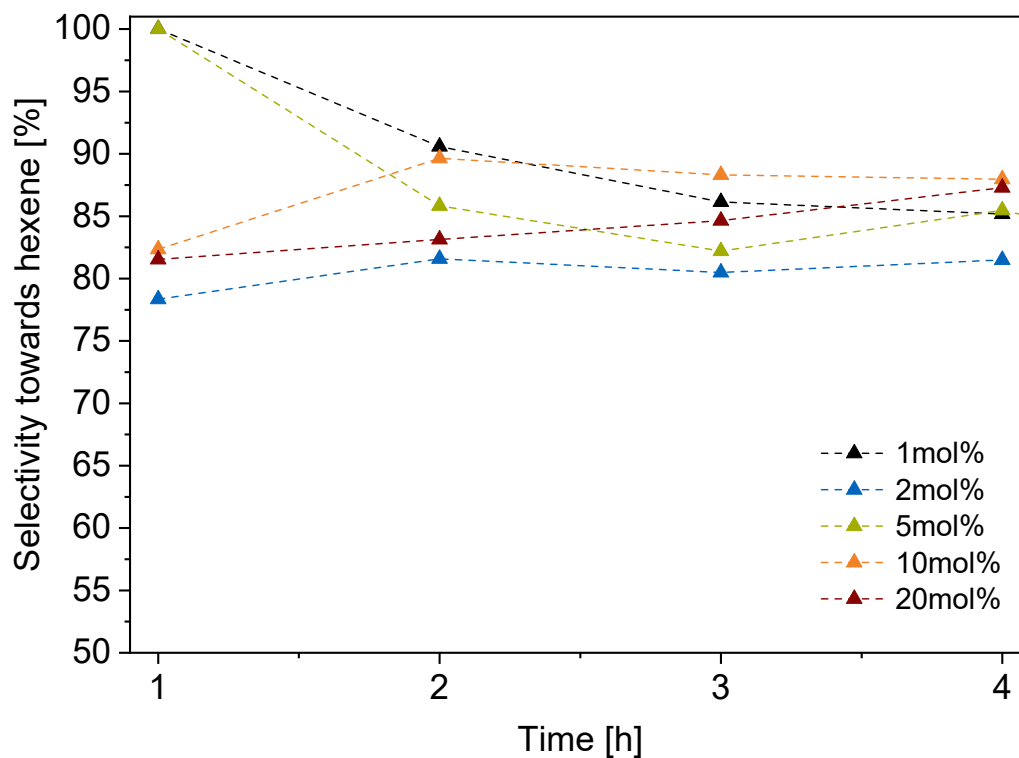

**Figure S20.** Influence of the loading of the colloidal Pd<sub>0.5</sub>Ga<sub>0.5</sub> catalyst on the selectivity by variation of the catalyst amount using Pd<sub>0.5</sub>Ga<sub>0.5</sub> colloids.

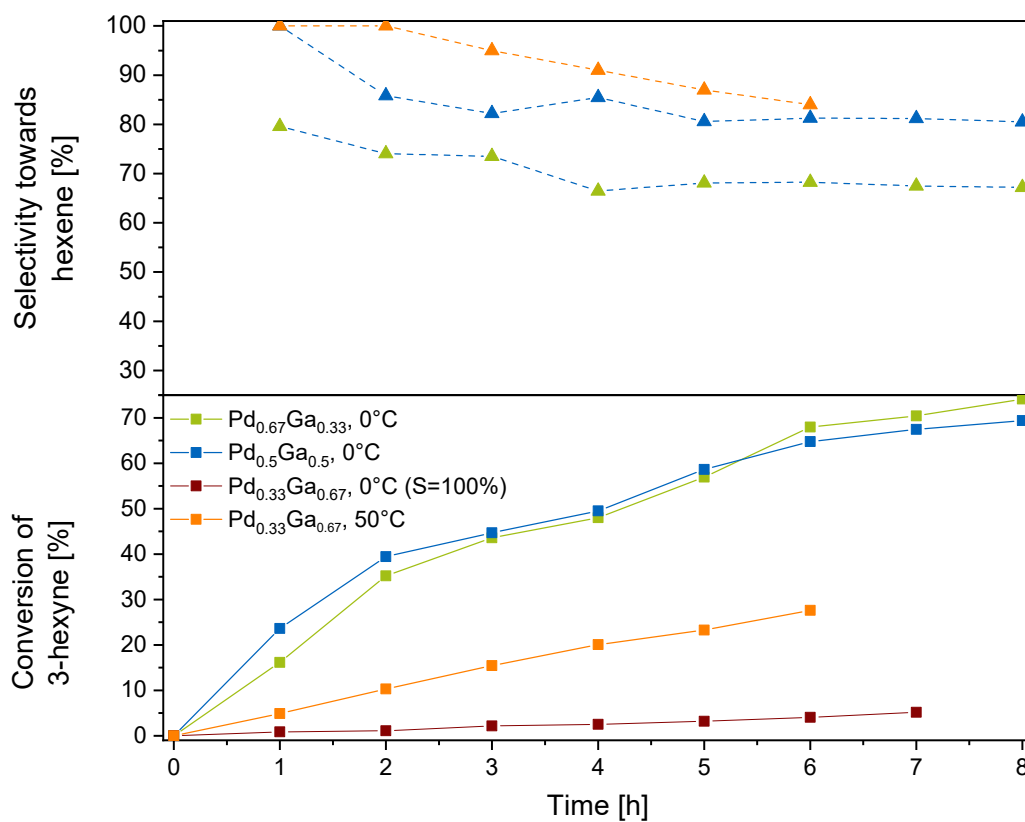

**Figure S21.** Testing of the catalytic performance of Pd<sub>1-x</sub>Ga<sub>x</sub> NPs in the semi-hydrogenation of 3-hexyne with different Pd/Ga ratios using 5 mol% catalyst.

## Calculation of rate constants

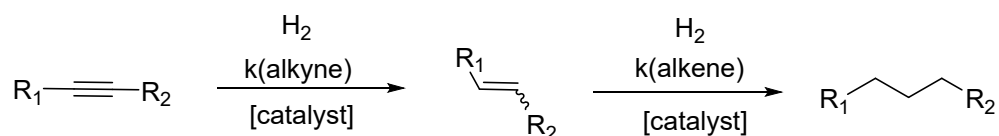

$$r = \frac{dc(\text{alkyne})}{dt} = k(\text{alkyne}) \cdot c(\text{alkyne})$$

**Table S5.** Calculated ratio of the rate constants  $k(\text{alkyne})$  and  $k(\text{alkene})$ . Catalytic tests were performed using 5 mol%  $\text{Pd}_{0.67}\text{Ga}_{0.33}$  as catalyst with 3-hexyne as substrate at 0°C and 2.0 bar  $\text{H}_2$ .

| Reaction time [h] | $\frac{k(\text{alkyne})}{k(\text{alkene})}$ |
|-------------------|---------------------------------------------|
| 1 → 2             | 2.873                                       |
| 2 → 3             | 2.932                                       |
| 3 → 4             | 2.918                                       |
| 4 → 5             | 2.635                                       |
| 5 → 6             | 2.706                                       |
| 6 → 7             | 2.062                                       |

**Table S6.** Calculated ratio of the rate constants  $k(\text{alkyne})$  and  $k(\text{alkene})$ . Catalytic tests were performed using 5 mol%  $\text{Pd}_{0.5}\text{Ga}_{0.5}$  as catalyst with 3-hexyne as substrate at 0°C and 2.0 bar  $\text{H}_2$ .

| Reaction time [h] | $\frac{k(\text{alkyne})}{k(\text{alkene})}$ |
|-------------------|---------------------------------------------|
| 1 → 2             | 3.253                                       |
| 2 → 3             | 3.193                                       |
| 3 → 4             | 3.238                                       |
| 4 → 5             | 3.162                                       |
| 5 → 6             | 2.678                                       |
| 6 → 7             | 2.348                                       |

## Substrate variation

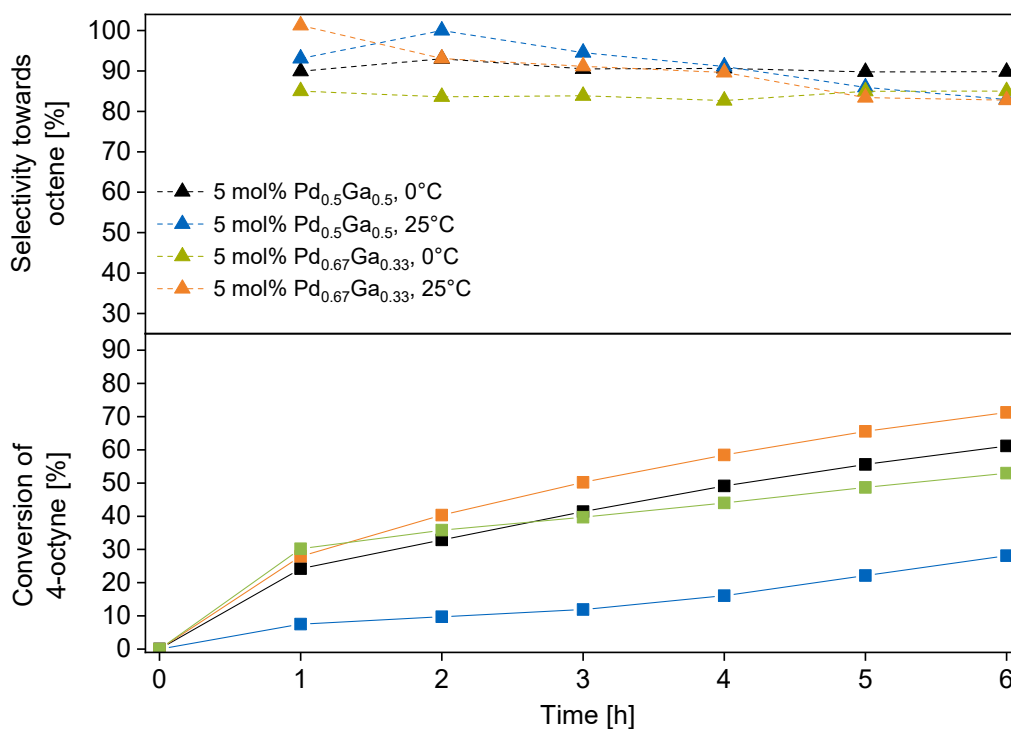

**Figure S22.** Semi-hydrogenation of 4-octyne as substrate using 5mol% Pd<sub>1-x</sub>Ga<sub>x</sub> colloids and 2.0 bar H<sub>2</sub> at various temperatures.

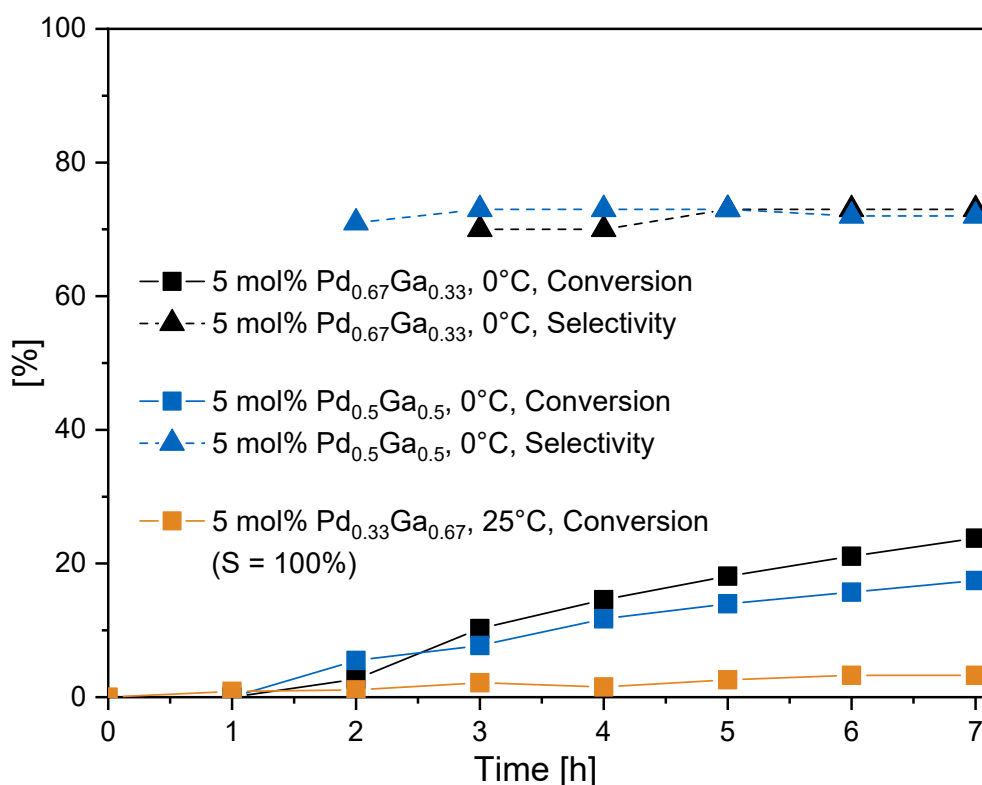

**Figure S23.** Catalytic tests on the semi-hydrogenation of 1-hexyne as substrate using Pd<sub>1-x</sub>Ga<sub>x</sub> colloids and 2.0 bar H<sub>2</sub> showing a strong increase of the catalyst activity.

## Substrate oligomerization using terminal alkynes

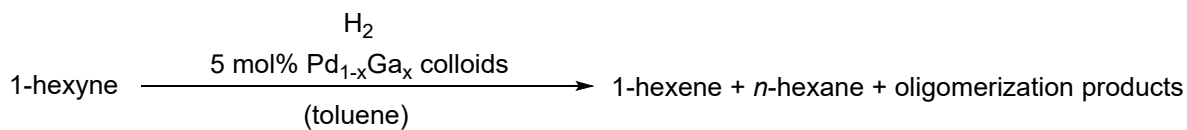

**Scheme S1.** Reaction scheme for the hydrogenation of the terminal alkyne 1-hexyne including undesired oligomerization processes during catalysis.

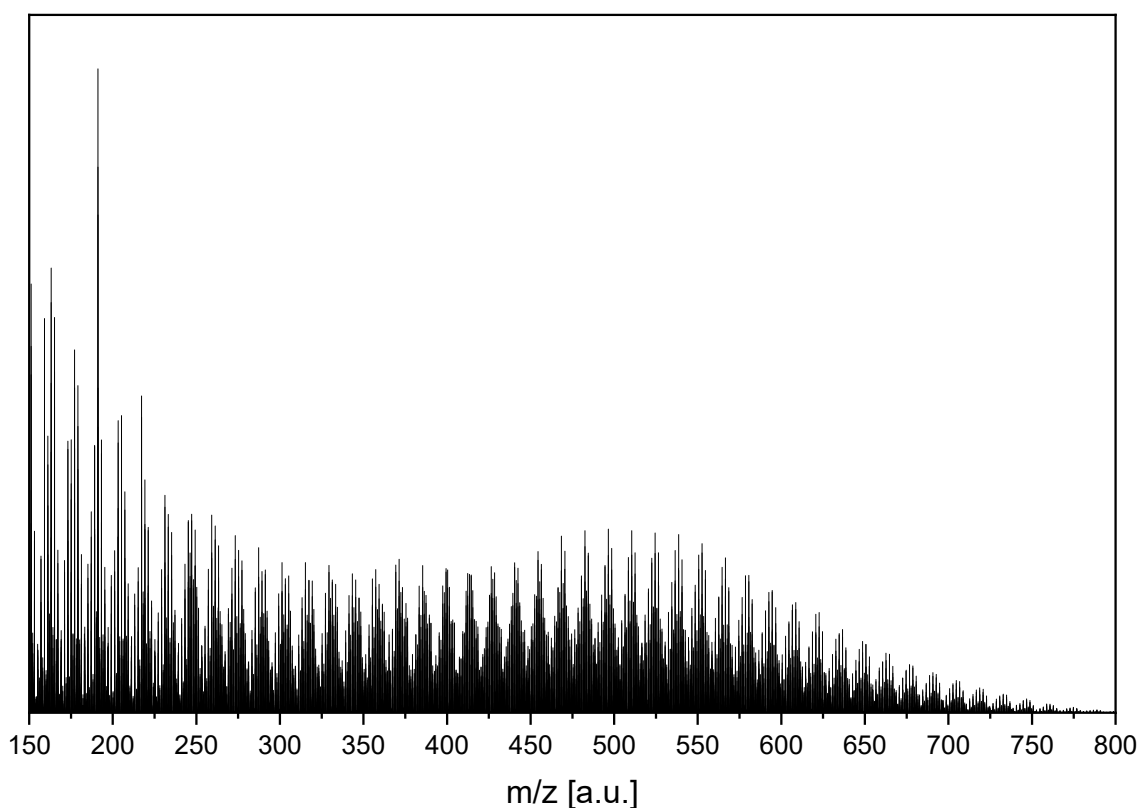

**Figure S24.** LIFDI-MS measurements of the reaction mixture after catalysis using 5mol% Pd<sub>0.5</sub>Ga<sub>0.5</sub> colloids, 2.0 bar H<sub>2</sub> at 0°C and 1-hexyne as substrate showing strong oligomerization.

## Calculation of TOF values and comparison with literature-known systems

$$\text{Calculation of TOF values: } \text{TOF [h}^{-1}\text{]} = \frac{\text{conversion (after 1 h)} \times n_0(\text{alkyne})}{n(\text{cat}) \times 1 \text{ h}}$$

$$\text{whereas } n(\text{cat}) = \frac{n(\text{all Pd}) \times 0,764 (\text{Pd surface atoms})}{\text{Pd/Ga ratio}}$$

The amount of Pd surface atoms was calculated based on the model of magic cluster numbers, with a Pd NP diameter of 1.5 nm. Here, in a monometallic Pd NP 76.4% of all Pd atoms are located on the surface. This value was then approximated to the corresponding Pd/Ga ratio; etc. for Pd/Ga = 1:1, the amount of active Pd atoms on the surface was divided by the factor 2. It must be mentioned that this calculation is only an approximation, as the core-shell structure of the particles was not considered, why the amount of active Pd surface atoms is rather overestimated and therefore the TOF value underestimated.

**Table S7.** Calculation of TOF values using 5mol% Pd<sub>1-x</sub>Ga<sub>x</sub>, 1 bar H<sub>2</sub> at 0 °C.

| Entry                                            | Conversion | n <sub>0</sub> (alkyne) [mol] | n(cat) [mol]            | TOF [h <sup>-1</sup> ] |
|--------------------------------------------------|------------|-------------------------------|-------------------------|------------------------|
| Pd <sub>0.67</sub> Ga <sub>0.33</sub> , 3-hexyne | 0,26       | 0,0000277                     | 5,72 × 10 <sup>-8</sup> | 126                    |
| Pd <sub>0.5</sub> Ga <sub>0.5</sub> , 3-hexyne   | 0,24       | 0,0000277                     | 4,33 × 10 <sup>-8</sup> | 153                    |
| Pd <sub>0.33</sub> Ga <sub>0.67</sub> , 3-hexyne | 0,05       | 0,0000277                     | 3,49 × 10 <sup>-8</sup> | 40                     |
| Pd <sub>0.67</sub> Ga <sub>0.33</sub> , 4-octyne | 0,30       | 0,0000277                     | 5,72 × 10 <sup>-8</sup> | 146                    |
| Pd <sub>0.5</sub> Ga <sub>0.5</sub> , 4-octyne   | 0,24       | 0,0000277                     | 4,33 × 10 <sup>-8</sup> | 155                    |
| Pd <sub>0.67</sub> Ga <sub>0.33</sub> , 1-hexyne | 0,05       | 0,0000277                     | 5,72 × 10 <sup>-8</sup> | 24                     |
| Pd <sub>0.5</sub> Ga <sub>0.5</sub> , 1-hexyne   | 0,03       | 0,0000277                     | 4,33 × 10 <sup>-8</sup> | 19                     |
| Pd <sub>0.33</sub> Ga <sub>0.67</sub> , 1-hexyne | 0,01       | 0,0000277                     | 3,49 × 10 <sup>-8</sup> | 10                     |

**Table S8.** Comparison of literature-known TOF values for hydrogenation reactions using small monometallic Pd NPs and heterogeneous Pd/Ga systems.

| Ref. | Metal/capping agent                               | NP size [nm] | Reaction type                     | Substrate                      | Reaction conditions                      | TOF [h <sup>-1</sup> ] | Conv.              | Sel. [%] |
|------|---------------------------------------------------|--------------|-----------------------------------|--------------------------------|------------------------------------------|------------------------|--------------------|----------|
| [S1] | Pd@PVP (1:100)                                    | 1.7±0.3      | Semi-hydrogenation                | 1-hexyne                       | 25°C, p(H <sub>2</sub> ) = 1bar          | 1320                   | 100 % after 5 h    | 93       |
|      |                                                   |              |                                   | 2-hexyne                       |                                          | 23400                  | 100 % after 40 min | 90       |
|      |                                                   |              |                                   | 3-hexyne                       |                                          | 12600                  | 100 % after 30 min | 95       |
| [S2] | Pd@PVP (1: 20)                                    | 2.1±0.1      | Semi-hydrogenation                | dehydroisophytol methylbutenol | 40°C, p(H <sub>2</sub> ) = 4bar          | 42840<br>48780         | 100 %<br>100 %     | 96<br>98 |
| [S2] | Pd@PVP (1:10)                                     | 3.6±0.4      | Semi-hydrogenation                | dehydroisophytol methylbutenol | 40°C, p(H <sub>2</sub> ) = 4bar          | 69120<br>78960         | 100 %<br>100 %     | 89<br>98 |
| [S3] | Pd@(BCN)MI(NTf <sub>2</sub> )                     | 7.3±2.2      | Semi-hydrogenation                | diphenylacetylene              | 25°C, p(H <sub>2</sub> ) = 1bar          | 13                     | 87 % after 6.5 h   | 98       |
|      |                                                   |              |                                   | phenylacetylene                |                                          | 35                     | 97 % after 2.8 h   | 95       |
|      |                                                   |              |                                   | 3-hexyne                       |                                          | 231                    | 100 % after 1.3 h  | 92       |
| [S5] | Pd@SC <sub>8</sub>                                | 2.3          | Selective hydrogenation of dienes | 2,3-dimethylbuta-1,3-diene     | 25°C, p(H <sub>2</sub> ) = 1bar          | 375                    | 100 % after 24 h   | 100      |
| [S5] | Pt@SC <sub>12</sub>                               | 1.5          | Full-hydrogenation                | Methyl propiolate              | 25°C, p(H <sub>2</sub> ) = 1bar          | 30                     | 100 % after 24 h   | “high”   |
| [S6] | Pd <sub>2</sub> Ga                                | -            | Semi-hydrogenation                | Acetylene                      | 200°C, flow reactor (5% H <sub>2</sub> ) | 58                     | 93 % after 20 h    | 76       |
| [S6] | PdGa                                              | -            | Semi-hydrogenation                | Acetylene                      | 200°C, flow reactor (5% H <sub>2</sub> ) | 1                      | 86 % after 20 h    | 75       |
| [S6] | Pd <sub>3</sub> Ga <sub>7</sub>                   | -            | Semi-hydrogenation                | Acetylene                      | 200°C, flow reactor (5% H <sub>2</sub> ) | 1                      | 99 % after 20 h    | 71       |
| [S6] | Pd@Al <sub>2</sub> O <sub>3</sub>                 | -            | Semi-hydrogenation                | Acetylene                      | 200°C, flow reactor (5% H <sub>2</sub> ) | 2452                   | 43 % after 20 h    | 17       |
| [S6] | Pd <sub>2</sub> Ga@Al <sub>2</sub> O <sub>3</sub> | 2-6          | Semi-hydrogenation                | Acetylene                      | 200°C, flow reactor (5% H <sub>2</sub> ) | 6615                   | 88 % after 20 h    | 67       |

### 3. Analysis of the Pd<sub>1-x</sub>Ga<sub>x</sub> (x = 0.67, 0.5, 0.33) colloids after catalysis runs

HR-TEM measurements

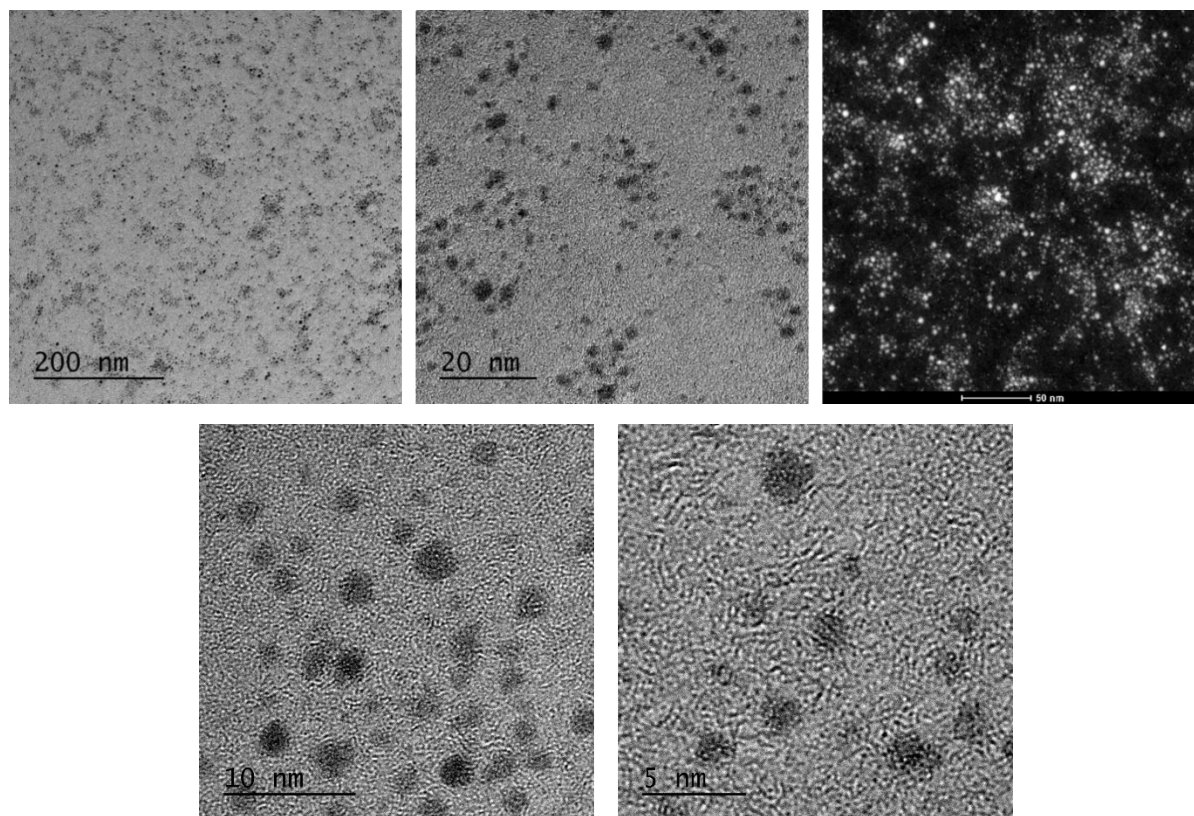

**Figure S26.** HR-TEM image and HAADF of Pd<sub>0.5</sub>Ga<sub>0.5</sub> colloids after semi-hydrogenation catalysis of 3-hexyne at 0°C and 2.0 bar H<sub>2</sub> after 5 h.

## DLS measurements

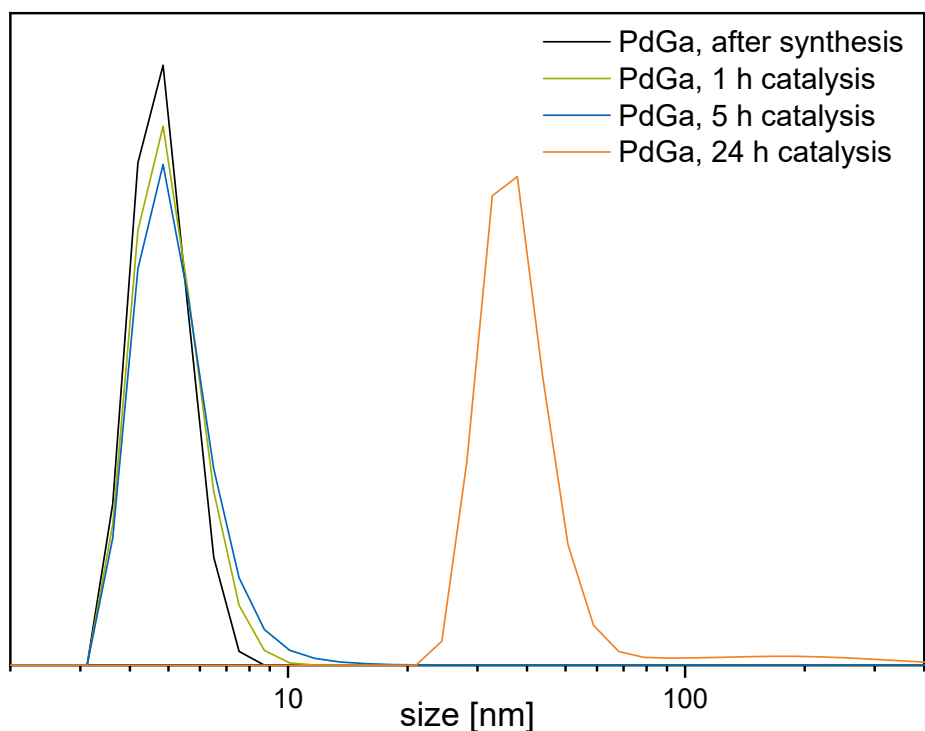

**Figure S27.** DLS monitoring of Pd<sub>0.5</sub>Ga<sub>0.5</sub> colloids during the semi-hydrogenation of 3-hexyne at 0°C and 2.0 bar H<sub>2</sub>.

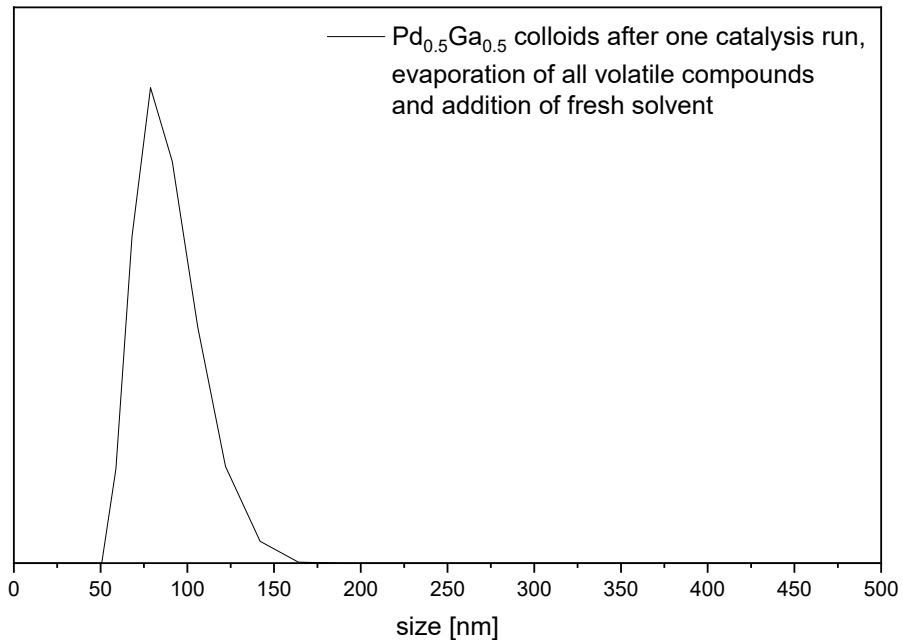

**Figure S28.** DLS measurements of Pd<sub>0.5</sub>Ga<sub>0.5</sub> colloids after one catalysis run, evaporation of all volatile compounds and addition of fresh solvent and substrate showing agglomeration.

A loss of catalytic activity for the second run is observed for longer reaction times, which can be explained with a particle agglomeration with NP sizes around 80 nm according to DLS measurements. This rather high degree of agglomeration can be attributed to the sample preparation, as after the first run, all volatile compounds were removed in vacuo leading to an increased particle destabilization and agglomeration.



## IR measurements

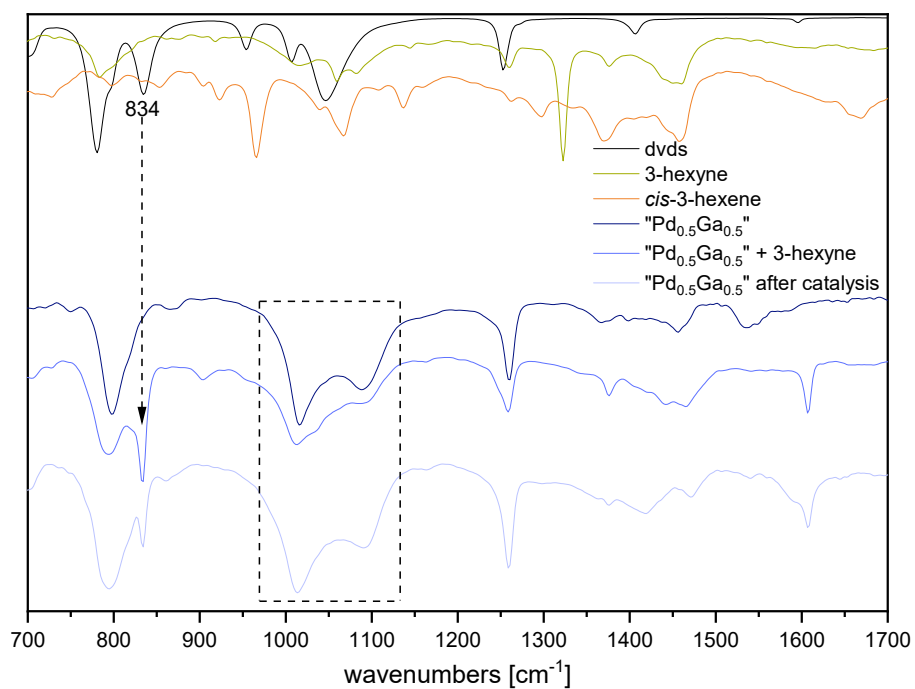

**Figure S29.** ATR FT-IR measurement of the Pd<sub>0.5</sub>Ga<sub>0.5</sub> colloids upon addition of 3-hexyne and after catalysis runs (bottom traces, blue) and pure dvds and Cp\*H as reference (upper traces, black, green and orange).

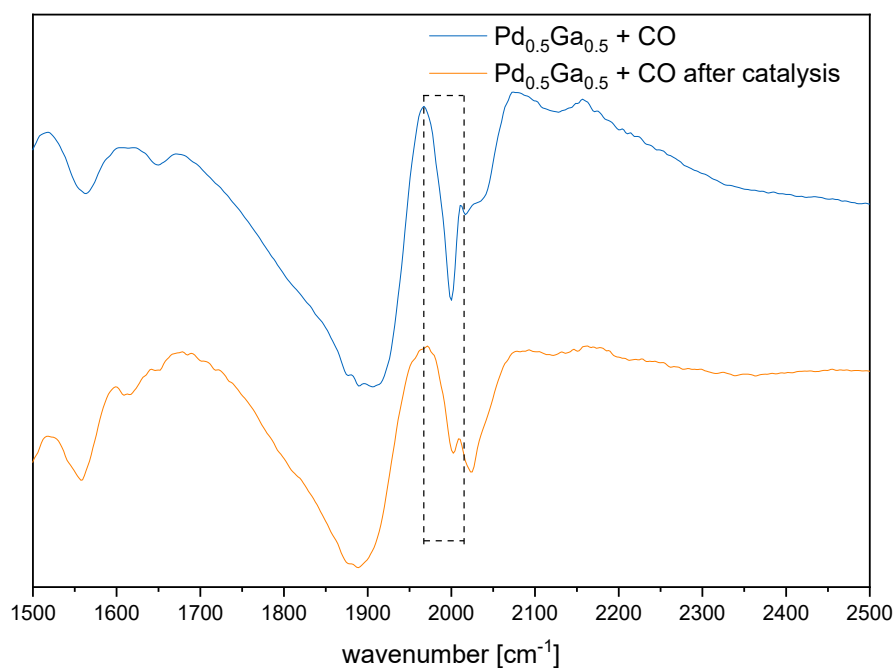

**Figure S30.** ATR FT-IR measurement of the Pd<sub>0.5</sub>Ga<sub>0.5</sub> colloids upon addition of CO before (blue trace) and after (orange trace) the catalytic semi-hydrogenation of 3-hexyne showing a decrease of the signal at 2000  $\text{cm}^{-1}$  typical for linearly bonded CO.

## 4. References

- [S1] C. Evangelisti, N. Panziera, A. D'Alessio, L. Bertinetti, M. Botavina, G. Vitulli, *J. Catal.* **2010**, *272*, 246–252.
- [S2] A. Yarulin, I. Yuranov, F. Cardenas-Lizana, P. Abdulkin, L. Kiwi-Minsker, *J. Phys. Chem. C* **2013**, *117*, 13424–13434.
- [S3] R. Venkatesan, M. H. G. Precht, J. D. Scholten, R. P. Pezzi, G. Machadoc, J. Dupont, *J. Mater. Chem.* **2011**, *21*, 3030–3036.
- [S4] T. Chen, Y. S. Shon, *Catal. Sci. Technol.* **2017**, *7*, 4823–4829.
- [S5] K. A. San, V. Chen, Y.-S. Shon, *ACS Appl. Mater. Interfaces* **2017**, *9*, 9823–9832.
- [S6] a) M. Armbrüster, M. Behrens, D. Teschner, Y. Grin, R. Schlögl, *J. Am. Chem. Soc.* **2010**, *132*, 42, 14745–14747; b) M. Armbrüster, K. Kovnir, M. Behrens, D. Teschner, Y. Grin, R. Schlögl, *JACS* **2010**, *132*, 14745-14747.
